# Supplementary material for: Machine learning methods for empirical streamflow simulation: a comparison of model accuracy, interpretability, and uncertainty in seasonal watersheds
Source: Copernicus journal article supplement (doi:10.5194/hess-20-2611-2016), 2016-07-04
Supplement: Supplementary file 1 [file hess-20-2611-2016-supplement.pdf]

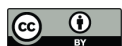

*Supplement of*

**Machine learning methods for empirical streamflow simulation:  
a comparison of model accuracy, interpretability, and  
uncertainty in seasonal watersheds**

**J. E. Shortridge et al.**

*Correspondence to:* Julie E. Shortridge ([jshortridge@jhu.edu](mailto:jshortridge@jhu.edu))

The copyright of individual parts of the supplement might differ from the CC-BY 3.0 licence.

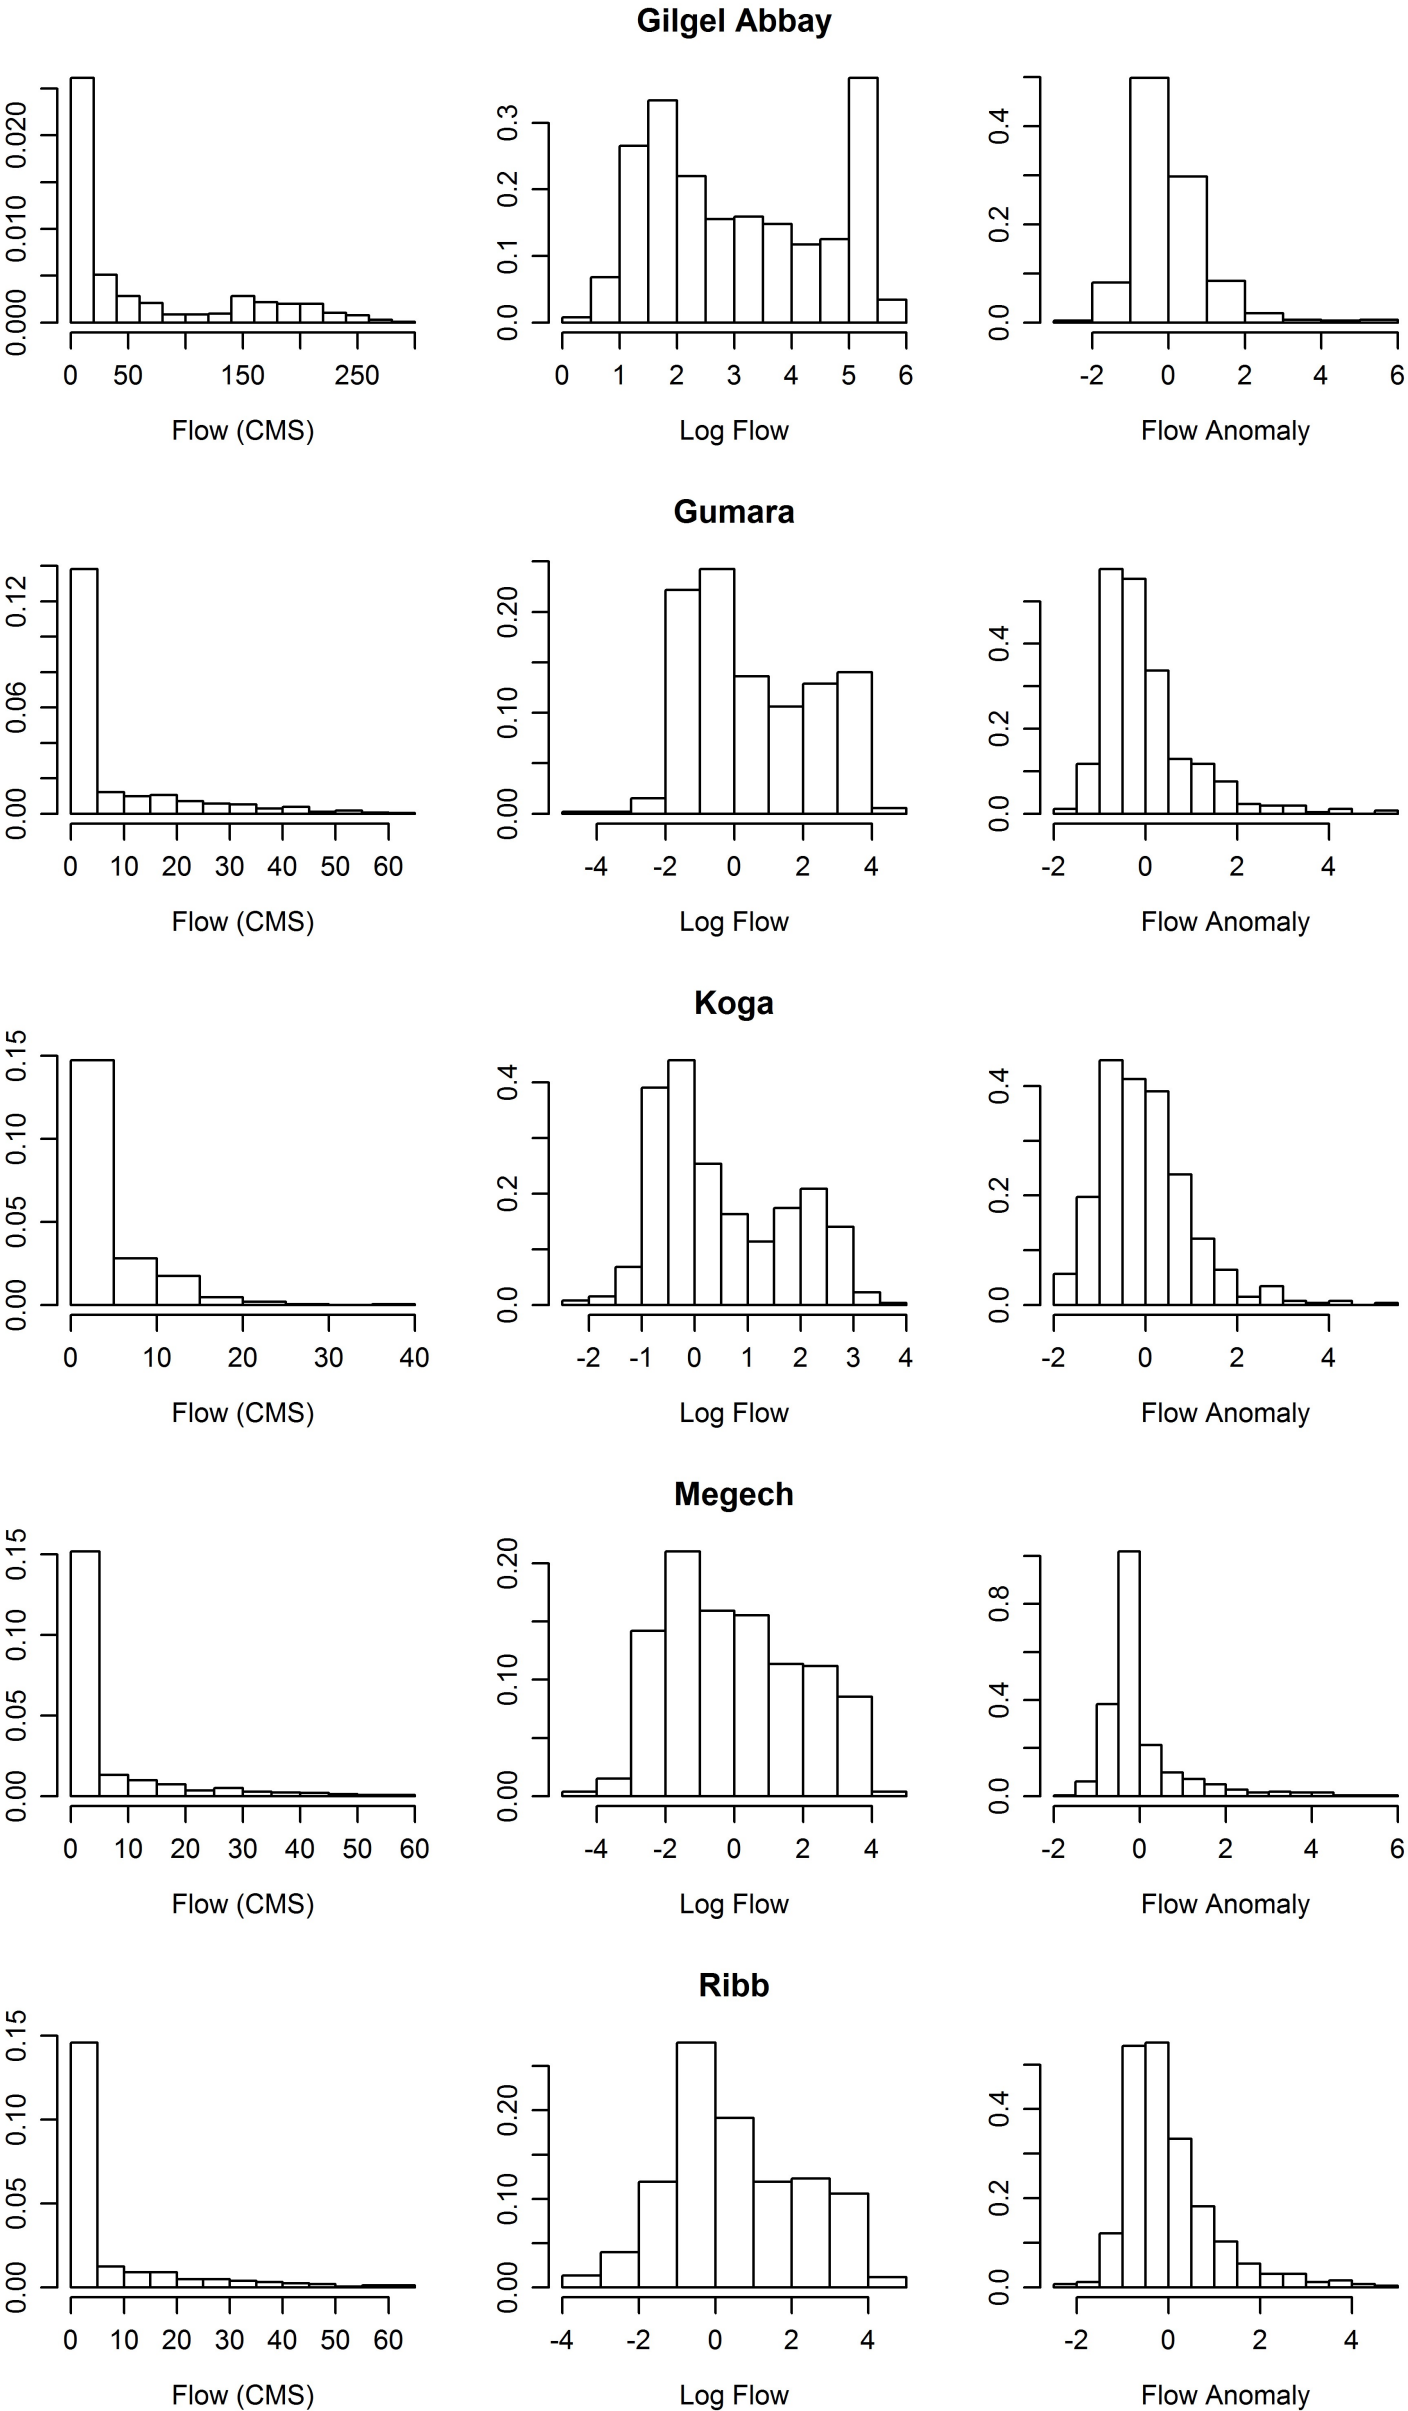

Figure S1: Histograms showing the distribution of streamflow data in each basin when untransformed (first column), log-transformed (second column), and transformed to an anomaly value (third column)
